# Supplementary material for: The biggest losers: Habitat isolation deconstructs complex food webs from top to bottom
Source: bioRxiv or medRxiv preprint supplement (doi:10.1101/439190), 2019-06-11
Supplement: Supplementary file [file media-1.pdf]

## Supplement to "The biggest losers: Habitat isolation deconstructs complex food webs from top to bottom"

Remo Ryser<sup>1,2,†,\*</sup>, Johanna Häussler<sup>1,2,†</sup>, Markus Stark<sup>3,†</sup>, Ulrich Brose<sup>1,2</sup>, Björn C. Rall<sup>1,2</sup>, and  
Christian Guill<sup>3,\*</sup>

<sup>1</sup>EcoNetLab, German Centre for Integrative Biodiversity Research (iDiv) Halle-Jena-Leipzig, Deutscher Platz 5e,  
04103 Leipzig, Germany

<sup>2</sup>Institute of Biodiversity, Friedrich Schiller University Jena, Dornburger-Strasse 159, 0773 Jena, Germany

<sup>3</sup>Institute of Biochemistry and Biology, University of Potsdam, Maulbeerallee 2, 14469 Potsdam, Germany

<sup>†</sup>These authors contributed equally

\*Correspondence and requests should be addressed to [remo.ryser@idiv.de](mailto:remo.ryser@idiv.de) and [guill@uni-potsdam.de](mailto:guill@uni-potsdam.de)

## 1 **S1 Food web and local population dynamics**

2 We consider a multitrophic metacommunity consisting of 40 species on a varying number of randomly positioned  
 3 habitat patches,  $Z$  (the meta-food-web, figure 1b). All patches have the same abiotic conditions and each patch can  
 4 potentially harbour the full food web, consisting of 10 basal plant and 30 animal consumer species. The feeding links  
 5 (i.e. who eats whom) are constant over all patches (figure 1a,b) and are as well as the feeding dynamics determined by  
 6 the allometric food web model by Schneider *et al.* [1]. We integrate dispersal as species-specific biomass flow between  
 7 habitat patches (figure 1b,d).

8 Using ordinary differential equations to describe the feeding and dispersal dynamics, the rate of change in biomass  
 9 density,  $B_{i,z}$ , of species  $i$  on patch  $z$  is given by

$$\frac{dB_{i,z}}{dt} = T_{i,z} - E_{i,z} + I_{i,z}, \quad (1)$$

10 with  $T_{i,z} = v_{i,z} \cdot B_{i,z}$  as the rate of change in biomass density determined by local feeding interactions (where  $v_{i,z}$  is the  
 11 per capita growth rate, see table S2),  $E_{i,z}$  as the total emigration rate of species  $i$  from patch  $z$  (equation 2), and  $I_{i,z}$  as  
 12 the total rate of immigration of species  $i$  into patch  $z$  (equation 4).

### 13 **Local food web dynamics**

14 We use an allometric trophic network model (ATN model) based on the work of Schneider *et al.* [1] & Kalinkat *et*  
 15 *al.* [2] to simulate the trophic dynamics of local populations ( $T_{i,z}$  in Equation 1). Regarding this term, we distinguish  
 16 between animal species (Equation T1-1) and basal plant species (Equation T1-6). In each patch, the biomass dynamics  
 17 of animal species (biomass densities  $A_{i,z}$ ) is given by the differences between growth due to consumption of animal  
 18 or plant species and losses due to mortality through predation and metabolic demands. The rate of change in plant  
 19 biomass densities  $P_{i,z}$  depends on the uptake of the two resources, mortality through grazing, and also accounts for  
 20 metabolic losses. We used a dynamic nutrient model (equation T1-8) with two nutrients (concentrations  $N_{i,z}$ ) of different  
 21 importance as the energetic basis of our food web [1, 3].

22 The topological network model is an extension of the niche model originally introduced by Williams & Martinez [4]  
 23 and accounts for allometric degree distributions and recent data on scaling relationships for species body mass and  
 24 trophic levels [5]. Each species  $i$  is fully characterised by its average adult body mass  $m_i$ . We sampled  $\log_{10}$  body  
 25 masses of animal species randomly with a uniform probability density from the inclusive interval (2, 12) and the  $\log_{10}$

26 body masses of plant species from the inclusive interval  $(0, 6)$  (for empirical examples see [6]). This step makes the  
27 model inherently stochastic, but from hereon, all other steps are completely deterministic. The model is designed such  
28 that animal consumers feed on resources, which can be both plants and other animal species that are smaller than  
29 themselves. Body masses further determine the interaction strengths of feeding links as well as the metabolic demands  
30 of species.

31 Data from empirical feeding interactions are used to parametrise the functions that characterise the optimal prey  
32 body mass and the location and width of the feeding niche of a predator. From each  $m_i$  a unimodal attack kernel, called  
33 feeding efficiency,  $L_{ij}$ , is constructed which determines the probability of consumer species  $i$  to attack and capture an  
34 encountered resource species  $j$ . We model  $L_{ij}$  as an asymmetrical hump-shaped Ricker's function (equation T1-4) that  
35 is maximised for an energetically optimal resource body mass (optimal consumer-resource body mass ratio  $R_{opt} = 100$ )  
36 and has a width of  $\gamma = 2$ . The maximum of the feeding efficiency  $L_{ij}$  equals 1. Table S1 list the full set of equation  
37 and table S2 is an overview of the standard parameter set for the equations. See also Schneider *et al.* [1] for further  
38 information regarding the allometric food web model.

Table S1: Ordinary differential equations describing the local population dynamics driven by feeding interactions (see Schneider *et al.* [1]. We use the same allometric constraints and parameter ranges.

| Equation No.  | Model equations                                                                                                                                                | Description                                                                                                                                                                                                                                                                                                                                                                                                                                                                                                                                                                                                                                                                                                                                                                                                                                           |
|---------------|----------------------------------------------------------------------------------------------------------------------------------------------------------------|-------------------------------------------------------------------------------------------------------------------------------------------------------------------------------------------------------------------------------------------------------------------------------------------------------------------------------------------------------------------------------------------------------------------------------------------------------------------------------------------------------------------------------------------------------------------------------------------------------------------------------------------------------------------------------------------------------------------------------------------------------------------------------------------------------------------------------------------------------|
| Equation T1-1 | <p>Animal population dynamics</p> $\frac{dA_{i,z}}{dt} = e_P A_{i,z} \sum_j F_{ij,z} + e_A A_{i,z} \sum_k F_{ik,z} - \sum_k A_{k,z} F_{ki,z} - x_i A_{i,z}$    | <p>Rate of change of biomass density of animal species <math>i</math> on patch <math>z</math>; with conversion efficiency <math>e_P = 0.545</math> typical for herbivory [7]; conversion efficiency <math>e_A = 0.906</math> typical for carnivory [7]; feeding rate <math>F_{ij,z}</math> of consumer <math>i</math> on resource <math>j</math> on patch <math>z</math>; metabolic demands per unit biomass for animals <math>x_i = x_A m_i^{-0.305}</math> with scaling constant <math>x_A = 0.314</math> [8, 9]. The first sum goes over all plant resources <math>j</math>, the second over all animal resources <math>k</math> and the third over all animal predators <math>k</math> of animal species <math>i</math>.</p>                                                                                                                      |
| Equation T1-2 | <p>Functional response</p> $F_{ij,z} = \frac{\omega_i b_{i,j} R_{j,z}^{1+q}}{1 + c A_{i,z} + \omega_i \sum_k b_{ik} h_{ik} R_{k,z}^{1+q}} \cdot \frac{1}{m_i}$ | <p>Per unit biomass feeding rate of consumer <math>i</math> as function of its own biomass density, <math>A_i</math>, (taking interference competition <math>c</math>, which is the time lost due to intraspecific encounters, sampled from a normal distribution with mean <math>\mu_c = 0.8</math> and s.d. <math>\sigma_c = 0.2</math> for each food web), and biomass density of the resource <math>R_j</math> (either animal <math>A_j</math> or plant species <math>P_j</math>); with <math>b_{ij}</math>, resource specific capture coefficient (Eq. T1-3); <math>h_{ij}</math>, resource-specific handling time (Eq. T1-5); <math>\omega_i = 1/(\text{number of resource species of } i)</math>, relative consumption rate accounting for the fact that a consumer has to split its consumption if it has more than one resource species.</p> |

Continued on next page

**Table S1 – continued from previous page**

| Equation No.  | Model equations                                                                                                | Description                                                                                                                                                                                                                                                                                                                                                                                                                                                                                                                                                                                                                                                                                                                                                                                                                                                                                                          |
|---------------|----------------------------------------------------------------------------------------------------------------|----------------------------------------------------------------------------------------------------------------------------------------------------------------------------------------------------------------------------------------------------------------------------------------------------------------------------------------------------------------------------------------------------------------------------------------------------------------------------------------------------------------------------------------------------------------------------------------------------------------------------------------------------------------------------------------------------------------------------------------------------------------------------------------------------------------------------------------------------------------------------------------------------------------------|
| Equation T1-3 | Capture coefficient<br>$b_{ij} = a_k m_i^{\beta_i} m_j^{\beta_j} L_{ij}$                                       | Resource specific capture coefficient of consumer species $i$ on resource species $j$ scaling the feeding kernel $L_{ij}$ by a power function of consumer and resource body mass, assuming that the encounter rate between consumer and resource scales with their respective movement speed. We sample the exponents $\beta_i$ and $\beta_j$ from normal distributions (mean $\mu_{\beta_i} = 0.42$ , s.d. $\sigma_{\beta_i} = 0.05$ ; $\mu_{\beta_j} = 0.19$ , s.d. $\sigma_{\beta_j} = 0.04$ , respectively [10]). We divide here the group of consumer species into the subgroup of carnivorous and herbivorous species each comprising a constant scaling factor for their capture coefficients $a_k$ with $k \in 0, 1$ ( $a_0 = 40$ for carnivorous species and $a_1 = 5000$ for herbivorous species); For plant resources, $m_j^{\beta_j}$ was replaced with the constant value of 1 (as plants do not move). |
| Equation T1-4 | Feeding efficiency<br>$L_{ij} = \left( \frac{m_i}{m_j R_{opt}} e^{1 - \frac{m_i}{m_j R_{opt}}} \right)^\gamma$ | The probability of consumer $i$ to attack and capture an encountered resource $j$ (which can be either plant or animal), described by an asymmetrical hump-shaped curve (Ricker's function), with width $\gamma = 2$ centered around an optimal consumer-resource body mass ratio $R_{opt} = 100$ .                                                                                                                                                                                                                                                                                                                                                                                                                                                                                                                                                                                                                  |
| Equation T1-5 | Handling time<br>$h_{ij} = h_0 m_i^{\eta_i} m_j^{\eta_j}$                                                      | The time consumer $i$ needs to kill, ingest and digest resource species $j$ , with scaling constant $h_0 = 0.4$ and allometric exponents $\eta_i$ and $\eta_j$ drawn from normal distributions with means $\mu_{\eta_i} = -0.48$ and $\mu_{\eta_j} = -0.66$ , and standard deviations $\sigma_{\eta_i} = 0.03$ and $\sigma_{\eta_j} = 0.02$ , respectively [11].                                                                                                                                                                                                                                                                                                                                                                                                                                                                                                                                                     |

Continued on next page

**Table S1 – continued from previous page**

| Equation No.  | Model equations                                                                                               | Description                                                                                                                                                                                                                                                                                                                                                                                                                                                                                 |
|---------------|---------------------------------------------------------------------------------------------------------------|---------------------------------------------------------------------------------------------------------------------------------------------------------------------------------------------------------------------------------------------------------------------------------------------------------------------------------------------------------------------------------------------------------------------------------------------------------------------------------------------|
| Equation T1-6 | Plant population dynamics<br>$\frac{dP_{i,z}}{dt} = r_i G_i P_{i,z} - \sum_k A_{k,z} F_{k,i,z} - x_i P_{i,z}$ | Rate of change of biomass density of plant species $i$ on patch $z$ ; with predation loss $F_{k,i,z}$ summed over all consumer species $k$ feeding on plant species $i$ ; metabolic demands per unit biomass for plants $x_i = x_P m_i^{-0.25}$ with $x_P = 0.138$ ; intrinsic growth rate $r_i = m_i^{-0.25}$ ; species specific growth factor $G_i$ (Eq. T1-7).                                                                                                                           |
| Equation T1-7 | Growth factor for plants<br>$G_i = \min\left(\frac{N_1}{K_{i,1} + N_1}, \frac{N_2}{K_{i,2} + N_2}\right)$     | Species-specific growth factor of plants determined dynamically by the most limiting nutrient $l \in \{1, 2\}$ ; with $K_{i,l}$ , half-saturation densities determining the nutrient uptake efficiency assigned randomly for each plant species $i$ and nutrient $l$ (uniform distribution within (0.1, 0.2)). The term in the minimum operator approaches 1 for high nutrient concentrations.                                                                                              |
| Equation T1-8 | Nutrient dynamics<br>$\frac{dN_{l,z}}{dt} = D(S_l - N_l) - v_l \sum_{i,z} r_i G_i P_{i,z}$                    | Rate of change of nutrient concentration $N_l$ of nutrient $l \in \{1, 2\}$ on patch $z$ , with global turnover rate $D = 0.25$ , determining the rate at which nutrients are refreshed; supply concentration $S_l$ , determining the maximum nutrient level of each nutrient, $l$ , drawn from normal distributions with mean $\mu_S = 50$ and standard deviation $\sigma_S = 2$ (provided $S_l > 0$ ); relative nutrient content in plant species biomass $v_l$ ( $v_1 = 1, v_2 = 0.5$ ). |

## 40 S2 Generating landscapes

41 We generated differently fragmented landscapes, represented by random geometric graphs [12], by randomly drawing  
 42 the locations of  $Z$  patches from a uniform distribution between 0 and 1 for x- and y-coordinates respectively. We  
 43 created landscapes of different size by scaling the maximum dispersal distance of all organisms  $\delta_{max}$  with a factor,  $Q$ , to  
 44 represent landscape sizes with edge lengths between 0.01 and 10. We obtained the number of patches,  $Z$ , by using  
 45 a stratified random sampling approach, i.e. we added a random number drawn from an integer uniform distribution  
 46 between 0 and 9 to a series of numbers of 10, 20, . . . , 60. Similarly, we set the landscape size,  $Q$ , by adding a random  
 47 number drawn from a uniform distribution between 0 and 1 (respectively 0 and 0.1 for landscape sizes below 1) to a  
 48 series of numbers of 0.01, 0.1, 0.2, 0.3, 0.5, 0.7, 0.9, 1, 3, 5, 7, 9.

## 49 S3 Dispersal

50 We model dispersal between local communities as a dynamic process of emigration and immigration, assuming dispersal  
 51 to occur at the same timescale as the local population dynamics [13]. Thus, biomass flows dynamically between local  
 52 populations and the dispersal dynamics directly influence local population dynamics and vice versa [14]. Similar  
 53 approaches have been used by e.g. Abrams & Ruokolainen [15] and Ims & Andreassen [16]. We model a hostile matrix  
 54 between habitat patches that does not allow for feeding interactions to occur during dispersal, and thus, assume the  
 55 biomass lost to the matrix to scale linearly with the distance travelled.

56 **Emigration** The total rate of emigration of species  $i$  from patch  $z$  is

$$E_{i,z} = d_{i,z} B_{i,z}, \quad (2)$$

57 with  $d_{i,z}$  as the corresponding per capita dispersal rate. We model  $d_{i,z}$  as

$$d_{i,z} = \frac{a}{1 + e^{b(x_i - v_{i,z})}}, \quad (3)$$

58 with  $a$ , the maximum dispersal rate,  $b$ , a parameter determining the shape of the dispersal rate (figure S1),  $x_i$ , the  
 59 inflection point determined by the metabolic demands per unit biomass of species  $i$ , and  $v_{i,z}$ , the per capita net growth  
 60 rate of species  $i$  on patch  $z$ . We chose to model  $d_{i,z}$  as a function of each species' per capita net growth rate to account

61 for emigration triggers such as resource availability, predation pressure and inter- and intraspecific competition [14, 17].  
62 If for example an animal species' net growth is positive, there is no need for dispersal and emigration will be low.  
63 However, if the local environmental conditions deteriorate, the growing incentives to search for a better habitat increase  
64 the fraction of individuals emigrating. For plants, we assumed an additional scenario as there are examples of different  
65 life history strategies. There are for example plant species which disperse from their local habitat when they are doing  
66 well, i.e. they have a high net growth rate, as they can allocate more resources into reproduction resulting in higher seed  
67 dispersal [18]. However, there are also examples where plants reallocate resources into reproduction when they are  
68 doing poorly [19] (figure S1b).

69 For each simulation run,  $a$  was sampled from a Gaussian distribution  $(\mu_{aS}, \sigma_{aS})$  and  $b$  was sampled from an integer  
70 uniform distribution within inclusive limits that differed between consumer and plant species (see table S2). The  
71 different intervals reflect different dispersal triggers for animals and plants.



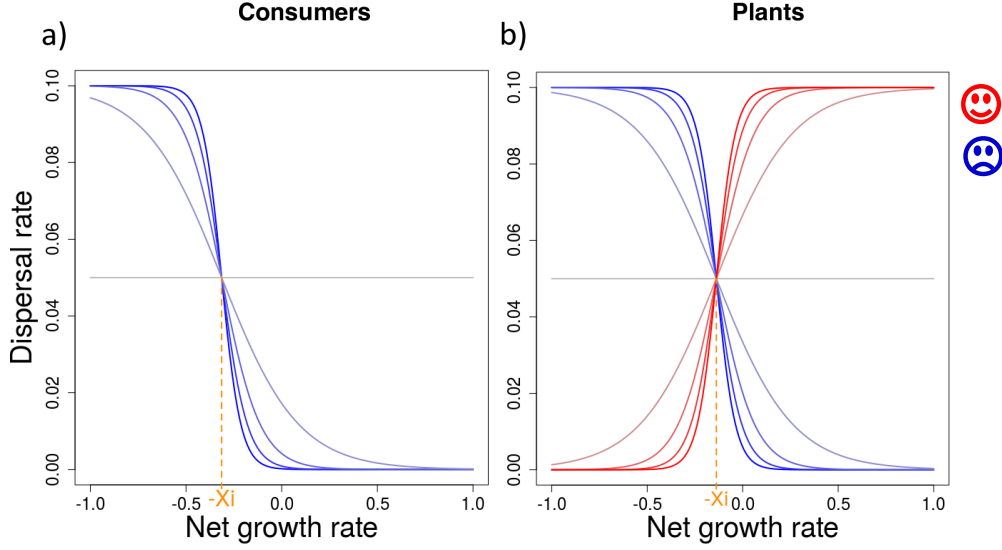

Figure S1: Functions illustrating the dispersal rate  $d_i$  for animal (a) and plant species (b), where  $x_i$  marks the inflection point for each species  $i$  determined by the metabolic demands per unit biomass of species  $i$  (see Table S1). The colours blue and red represent different dispersal strategies and the respective colour gradients depict the parameter range of  $b$ , which determines the slope of the dispersal rate (see equation 3 in the manuscript). For the purpose of illustration, we set the maximum dispersal rate to  $a = 0.1$  and for animals and plants  $x_{iA} = 0.314$  and  $x_{iP} = 0.1384$ , respectively.

72 **Immigration** The rate of immigration of biomass density of species  $i$  into patch  $z$  follows

$$I_{i,z} = \sum_{n \in N_z} E_{i,n} (1 - \delta_{i,nz}) \frac{1 - \delta_{i,nz}}{\sum_{m \in N_n} 1 - \delta_{i,nm}}, \quad (4)$$

73 where  $N_z$  and  $N_n$  are the sets of all patches within the dispersal range of species  $i$  on patches  $z$  and  $n$ , respectively. In  
 74 this equation,  $E_{i,n}$  is the emigration rate of species  $i$  from patch  $n$ ,  $(1 - \delta_{i,nz})$  is the fraction of successfully dispersing  
 75 biomass, i.e. the fraction of biomass not lost to the matrix, and  $\delta_{i,nz}$  is the distance between patches  $n$  and  $z$  relative to

76 species  $i$ 's maximum dispersal distance  $\delta_i$  (see below paragraph Maximum dispersal distance). The term  $\frac{1-\delta_{i,nz}}{\sum 1-\delta_{i,nm}}$   
 77 determines the fraction of biomass of species  $i$  emigrating from source patch  $n$  towards target patch  $z$ . This fraction  
 78 depends on the relative distance between the patches,  $\delta_{i,nz}$ , and the relative distances to all other potential target patches  
 79  $m$  of species  $i$  on the source patch  $n$ ,  $\delta_{i,nm}$ . Thus, the flow of biomass is greatest between patches with small distances.  
 80 For numerical reasons, we did not allow for dispersal flows with  $I_{i,z} < 10^{-10}$ . In this case, we immediately set  $I_{i,z}$  to 0.  
 81

82 **Maximum dispersal distance** Based on empirical observations (e.g. [20]) and previous theoretical frameworks (e.g.  
 83 [10, 21–23]), we assume that the maximum dispersal distance  $\delta_i$  of animal species increases with their body mass. For  
 84 animal species, the body mass  $m_i$  determines how fast and how far they can travel through the matrix before needing to  
 85 rest and feed in a habitat patch. Thus animal species at high trophic positions can disperse further than smaller animals  
 86 at lower trophic levels. Each animal species perceives its own dispersal network dependent on its species-specific  
 87 maximum dispersal distance

$$\delta_i = \delta_0 m_i^\epsilon, \quad (5)$$

88 where the exponent  $\epsilon = 0.05$  determines the slope of the body mass scaling of  $\delta_i$ . We chose a positive value for  $\epsilon$  to  
 89 account for a higher mobility of animals with larger body masses. The intercept  $\delta_0 = 0.1256$  was chosen such that the  
 90 animal species with the largest possible body mass of  $m_i = 10^{12}$  had a maximum dispersal distance of  $\delta_i = 0.5$ . Thus,  
 91 the animal species with the smallest possible body mass of  $m_i = 10^2$  had a maximum dispersal distance of  $\delta_i = 0.158$ .

92 As plants are passive dispersers driven by e.g. wind with no clear relationship between body mass and dispersal  
 93 distance, we model their maximum dispersal distance as random and body mass independent [20]. We sampled  $\delta_i$  for  
 94 each plant species from a uniform probability density within the interval  $(0, 0.5)$ . Thus, the best plant disperser can  
 95 potentially have the same maximum dispersal distance as the largest possible animal species (table S2). Additionally,  
 96 we tested a null model in which all species have the same maximum dispersal distance of  $\delta_i = \delta_{max}$ . See section S8 for  
 97 further information on the additional simulations.

Table S2: Model parameters and output variables.

| Parameter                                   | Description                                                                                                                                                                                                      | Value                                        |
|---------------------------------------------|------------------------------------------------------------------------------------------------------------------------------------------------------------------------------------------------------------------|----------------------------------------------|
| <b>Trophic interactions between species</b> |                                                                                                                                                                                                                  |                                              |
| $e_A$                                       | conversion efficiency animal species                                                                                                                                                                             | 0.906; [7]                                   |
| $e_P$                                       | conversion efficiency plant species                                                                                                                                                                              | 0.545; [7]                                   |
| $x_A$                                       | scaling constant metabolic demands animal species                                                                                                                                                                | 0.314; [9]                                   |
| $x_P$                                       | scaling constant metabolic demands plant species                                                                                                                                                                 | 0.138; [9]                                   |
| $\mu_c, \sigma_c$                           | mean and standard deviation for interference competition                                                                                                                                                         | 0.8, 0.2                                     |
| $a_0$                                       | scaling factor capture coefficient for carnivorous species                                                                                                                                                       | 40                                           |
| $a_1$                                       | scaling factor capture coefficient for herbivorous species                                                                                                                                                       | 5000                                         |
| $\mu_{\beta_i}, \sigma_{\beta_i}$           | mean and standard deviation allometric exponent for attack rates consumer                                                                                                                                        | 0.42, 0.05; [10]                             |
| $\omega_i$                                  | relative consumption rate                                                                                                                                                                                        | $\frac{1}{\text{number of prey species } i}$ |
| $R_{opt}$                                   | optimal consumer-resource body mass ratio                                                                                                                                                                        | 100                                          |
| $\gamma$                                    | scaling exponent Ricker's function                                                                                                                                                                               | 2                                            |
| $h_0$                                       | scaling factor handling time                                                                                                                                                                                     | 0.4                                          |
| $\mu_{\eta_i}, \sigma_{\eta_i}$             | mean and standard deviation allometric exponent handling time consumer                                                                                                                                           | -0.48, 0.03; [11]                            |
| $\mu_{\eta_j}, \sigma_{\eta_j}$             | mean and standard deviation allometric exponent handling time resource                                                                                                                                           | -0.66, 0.02; [11]                            |
| $\mu_q, \sigma_q$                           | mean and standard deviation hill coefficient                                                                                                                                                                     | 1.5, 0.2                                     |
| <b>Nutrient dynamics</b>                    |                                                                                                                                                                                                                  |                                              |
| $K$                                         | half saturation density nutrient uptake                                                                                                                                                                          | (0.1, 0.2)                                   |
| $D$                                         | nutrient turnover rate                                                                                                                                                                                           | 0.25                                         |
| $\mu_{S_i}, \sigma_{S_i}$                   | mean and standard deviation of nutrient supply concentration                                                                                                                                                     | 50, 2                                        |
| $\nu_1, \nu_2$                              | relative nutrient content in plant species biomass                                                                                                                                                               | 1, 0.5                                       |
| <b>Dispersal dynamics</b>                   |                                                                                                                                                                                                                  |                                              |
| $\delta_{max}$                              | species-specific maximum dispersal distance                                                                                                                                                                      | 0.5                                          |
| $\epsilon$                                  | scaling exponent for species-specific maximum dispersal distance                                                                                                                                                 | 0.05                                         |
| $\mu_{a_S}, \sigma_{a_S}$                   | mean and standard deviation of max. emigration                                                                                                                                                                   | 0.1, 0.03                                    |
| $\theta$                                    | cut off emigration function                                                                                                                                                                                      | $3 \cdot \sigma_{a_S}$                       |
| $b$                                         | shape parameter of the emigration function                                                                                                                                                                       | (0,19) (cons.)<br>(-20,19) (plants)          |
| <b>Output variables</b>                     |                                                                                                                                                                                                                  |                                              |
| $\bar{\tau}$                                | mean distance between all habitat patches, with $\tau_{nm}$ , the absolute distance between patches $n$ and $m$ , and $(Z^2 - Z)$ , the total number of potential directed links between all $Z$ habitat patches | $\frac{\sum_{n,m=1}^Z \tau_{nm}}{Z^2 - Z}$   |
| $\rho_i$                                    | landscape connectance of species $i$ , with $L_i$ , the number of directed dispersal links of species $i$                                                                                                        | $\frac{L_i}{Z^2 - Z}$                        |

## S4 Numerical simulations and data analysis

We constructed 30 model food webs, each comprising 10 plant and 30 animal species. To avoid confounding effects of different initial species diversities, we kept both the number of species  $S$  and the fraction of plants and animals constant among all food webs. For each simulation, we randomly generated a landscape of size  $Q$  (edge length of a square landscape) with  $Z$  randomly distributed habitat patches. To test each food web across a gradient of number of habitat patches and habitat isolation, we drew the number of habitat patches,  $Z$ , from the inclusive interval (10, 69) and the size of the landscape,  $Q$ , from the inclusive interval (0.01, 10) using a stratified random sampling approach (see also section S2 for further information). With this approach, we generated landscapes on two independent gradients covering two aspects of fragmentation, namely number of fragments and habitat isolation. To cover the full parameter range of  $Z$  and  $Q$ , we simulated each food web on 72 landscapes resulting in a total of 2160 simulations. We achieved a full range for the gradient of habitat isolation (landscape connectance ranging from 0 to 1, figure S3c). The upper limit for the number of patches was chosen to conform to the maximum usage time of 10 days per simulation on the high-performance-cluster we used [24]. Additionally, we performed dedicated simulation runs to reference the two extreme cases, i.e. (1) landscapes in which all patches are direct neighbours without a hostile matrix, and thus, no dispersal mortality, and (2) fully isolated landscapes, in which no species can bridge between patches, and thus, a dispersal mortality of 100% .

For each simulation run, we initialised our model with random conditions: Each habitat patch  $z$  holds a random selection of 21 to 40 species (with each of the 40 species of the full food web existing on at least one patch) and initial biomass densities  $B_{i,z}$  and nutrient concentrations  $N_l$  ( $l \in 1, 2$ ) were randomly sampled with uniform probability density within the intervals (0, 10) for  $B_{i,z}$  and  $(S_l/2, S_l)$  for  $N_l$ , respectively. Here,  $S_l$  are the supply concentrations of the nutrients, which are constant on all habitat patches but differ between the two nutrients. See table S2 and Schneider *et al.* [1] for further information on the nutrient dynamics.

Starting from these random initial conditions, we numerically simulated local food web and dispersal dynamics over 50,000 time steps by integrating the system of differential equations implemented in C++ using procedures of the SUNDIALS CVODE solver version 2.7.0 (backward differentiation formula with absolute and relative error tolerances of  $10^{-10}$  [25]). Successful dispersal between local populations thereby enabled species to establish populations on patches where they were initially absent. For numerical reasons, a local population was considered extinct once  $B_{i,z} < 10^{-20}$ , and  $B_{i,z}$  was then immediately set to 0.

## 126 **Output variables**

127 We recorded the following output variables for each simulation run: (1) the mean biomass density of each species  $i$   
128 on each habitat patch  $z$  over the last 20,000 time steps to capture oscillations,  $\bar{B}_{i,z}$ ; (2) the number of habitat patches  
129 in a landscape,  $Z$ ; (3) habitat isolation, i.e. the mean distance between all habitat patches,  $\bar{\tau}$  (see table S2); and (4)  
130 the landscape connectance of each species  $i$ ,  $\rho_i$  (see table S2). Thus,  $\rho_i$  determines the ability of a species to connect  
131 habitat patches in a fragmented landscape.

132 **Statistical models and data visualisation** We tested for correlation between initialised and emerged  $\beta$ -diversity,  
133 which was however not the case (see section S9). Further, we used generalised additive mixed models (GAMM) from  
134 the `mgcv` package in R [26] to visualise the impact of number of patches and habitat isolation on species diversity. To fit  
135 the model assumptions, we logit-transformed  $\bar{\alpha}$ -diversity, and log-transformed  $\beta$ -diversity. We analysed each diversity  
136 index separately, with the number of patches  $Z$  (log-transformed), the mean patch distance  $\bar{\tau}$  (log-transformed) and  
137 their interaction as fixed effects and the ID of the food web (1 - 30) as random factor (with normal distribution for  $\bar{\alpha}$ -  
138 and  $\beta$ -diversity, and binomial distribution for  $\gamma$ -diversity). Similarly, we analysed the mean biomass densities,  $\bar{B}_{i,z}$   
139 (log-transformed), and species-specific landscape connectance,  $\rho_i$ , for each species (ID 1 - 40) using GAMM with a  
140 normal distribution. We used the mean patch distance,  $\bar{\tau}$ , as fixed effect and the food web ID (1 - 30) as random effect.

## 141 **Analysis**

142 Out of the 2160 simulations we started, 57 were terminated by reaching the maximum usage time of 10 days per  
143 simulation on the high-performance-cluster we used [24]. We further deleted 30 simulations as they had entirely isolated  
144 landscapes with no dispersal links. We performed all statistical analyses in R version 3.3.2. [27] using the output of the  
145 remaining 2073 simulations. See also section S8 for additional information.

146 **Species diversity** We quantified Whittaker's  $\alpha$ -,  $\beta$ -, and  $\gamma$ -diversity [28] using presence-absence data derived from  
147 the recorded mean biomass densities,  $\bar{B}_{i,z}$ , counting species  $i$  present on patch  $z$  when  $\bar{B}_{i,z} > 10^{-20}$ . In Whittaker's  
148 approach,  $\alpha$  accounts for the local species richness,  $\beta$  is the component of regional diversity that accumulates from  
149 compositional differences between local communities, and  $\gamma$  is the regional diversity, i.e. the species richness at the  
150 landscape scale [28]. We relate  $\alpha$ ,  $\beta$  and  $\gamma$  to each other using multiplicative partitioning [28], i.e.  $\alpha \cdot \beta = \gamma$ . Here, we  
151 use  $\alpha$  averaged over all habitat patches  $Z$  (which we hereafter refer to as  $\bar{\alpha}$ ) to get a measure at the landscape level

152 comparable to  $\beta$  and  $\gamma$ .

153 **S5 Maximum trophic level**

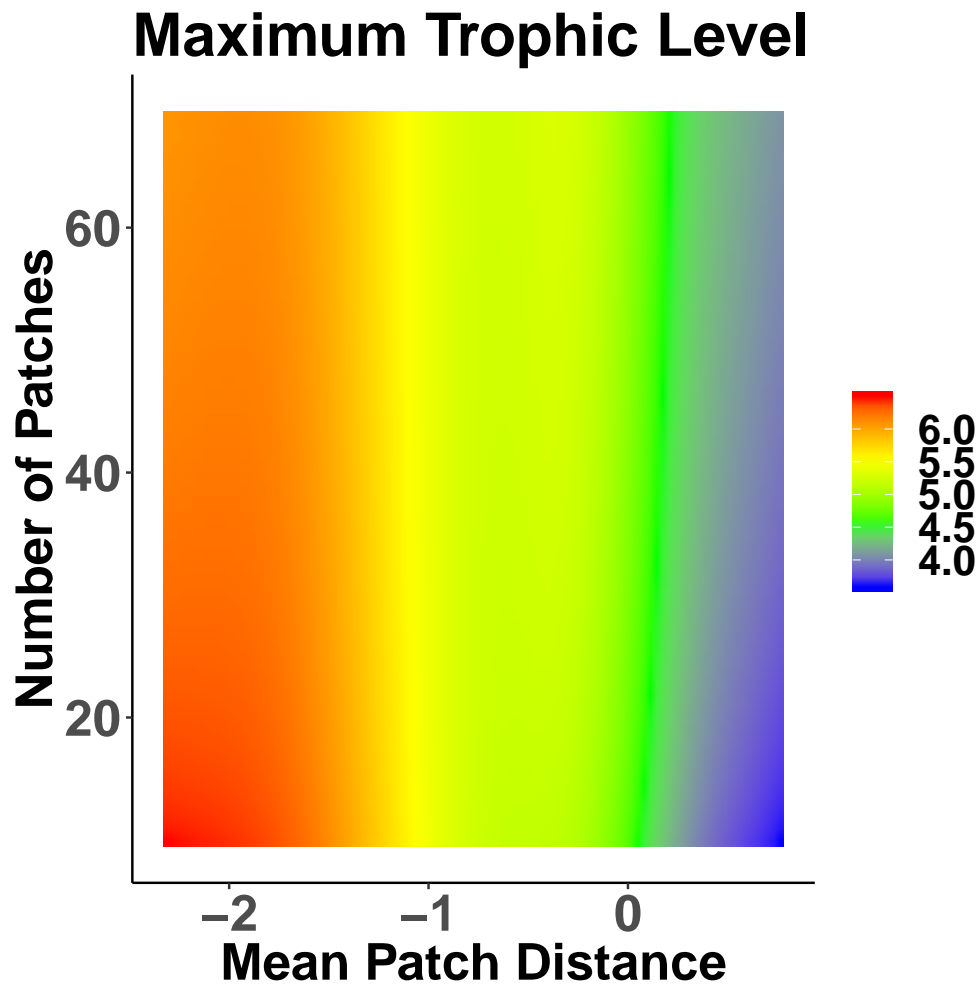

Figure S2: Heatmap visualising the maximum trophic level within a food web (colour-coded; z-axis) in response to habitat isolation, i.e. the mean patch distance ( $\bar{r}$ ,  $\log_{10}$ -transformed; x-axis) and the number of habitat patches ( $Z$ ; y-axis). The heatmap was generated based on the statistical model predictions (see the methods section in the manuscript). The loss of species diversity driven by habitat isolation also translates into a loss of the maximum trophic level.

154 **S6 Additional simulations with a constant maximum dispersal distance**

155 We repeated all simulations with a constant maximum dispersal range for all species of  $\delta_{const.} = 0.5$ , i.e. all species  
 156 have the same spatial network, to understand the effect of the dispersal advantage of larger animals. The results from  
 157 these simulations are very similar to the results with the species-specific scaling of dispersal ranges, showing the same  
 158 biomass density drop of larger animals at low mean distances (figure S3).

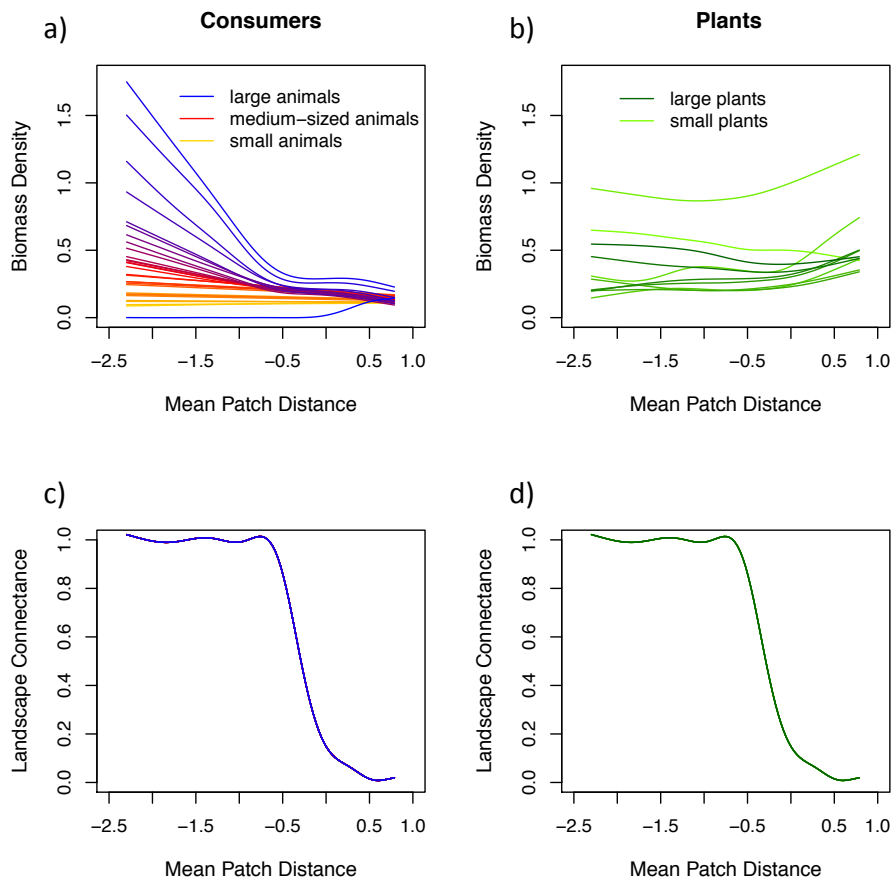

Figure S3: Top row: Mean biomass densities of consumer (a) and plant species (b) over all food webs ( $B_i$ ,  $\log_{10}$ -transformed; y-axis) in response to habitat isolation, i.e. the mean patch distance ( $\bar{\tau}$ ,  $\log_{10}$ -transformed; x-axis). Each colour depicts the biomass density of species  $i$  averaged over all food webs: (a) colour gradient where orange represents the smallest, red the intermediate and blue the largest consumer species; (b) colour gradient where light green represents the smallest and dark green the largest plant species. Bottom row: Mean species-specific landscape connectance ( $\rho_i$ ; y-axis) for consumer species (c) and plant species (d) over all food webs as a function of the mean patch distance ( $\bar{\tau}$ ,  $\log_{10}$ -transformed; x-axis), using the same maximum dispersal distance for all species,  $\delta_{const} = 0.5$ .

## 159 **S7 Additional simulations of the two extreme cases**

160 To explore the extreme cases of fragmentation in our model framework, we conducted additional simulations with  
161 emigration but no immigration on patches to represent completely isolated patches (disconnected), and landscapes  
162 with patches containing all species of the meta-food-web and neither emigration nor immigration to represent one joint  
163 landscape with no fragmentation (joint). For the disconnected scenario we simulated 12 replicates for each of the 30 food  
164 webs covering in the same stratified random gradient of patch numbers between 10 and 69 as in the main simulations  
165 and were also initialised with a subset of species (see the methods section in the paper). For the joint scenario we  
166 simulated 20 replicates for each food web containing 2 independent patches initialised with all species and no dispersal.

167 **(1) Joint scenario with no dispersal mortality**  $\bar{\alpha}$ -diversity is on average 37.621,  $\gamma$ -diversity 37.172 and  $\beta$ -diversity  
168 1.004 (figure S4, purple triangle).

169 **(2) Fully isolated scenario with 100% dispersal mortality**  $\bar{\alpha}$ -diversity is on average 11.945,  $\gamma$ -diversity 32.801 and  
170  $\beta$ -diversity 2.876 (figure S4, orange triangle).



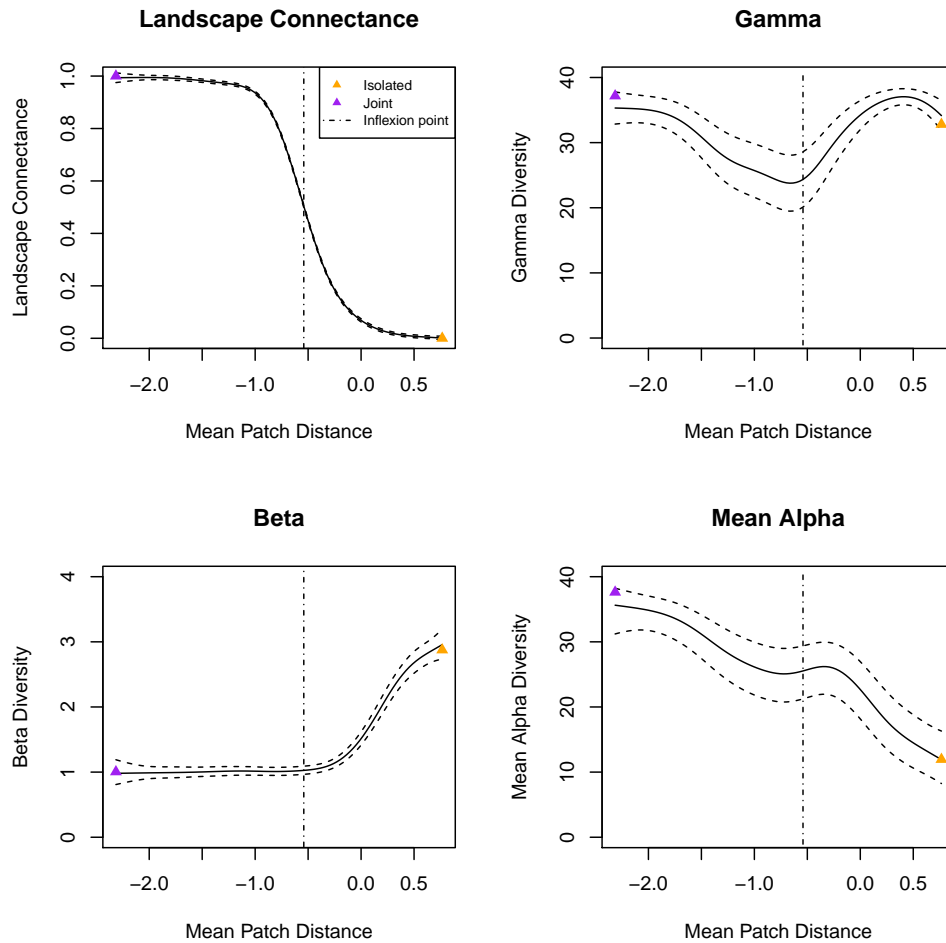

Figure S4: Shown are model predictions for landscapes with 40 patches across the whole gradient of the mean patch distance ( $\bar{\tau}$ ,  $\log_{10}$ -transformed; x-axis). Top-left panel showing the landscape connectance averaged over all species (y-axis) as response to the mean patch distance ( $\bar{\tau}$ ,  $\log_{10}$ -transformed; x-axis). Subsequent panels showing  $\gamma$ -diversity,  $\beta$ -diversity and  $\bar{\alpha}$ -diversity (y-axes) in response to the mean patch distance ( $\bar{\tau}$ ,  $\log_{10}$ -transformed; x-axis). Purple triangles represent reference points from dedicated simulations in a joint scenario and orange triangles for fully isolated scenarios (see section S7).

## 171 S8 Sensitivity analysis

172 We tested the effect of randomly drawn dispersal parameters (maximum dispersal rate,  $a$ , and the shape of the dispersal  
 173 function,  $b$ ; see the manuscript, equation 3) on mean  $\alpha$ -,  $\beta$ - and  $\gamma$ -diversity for consumers and plants respectively.  
 174 We used generalised additive mixed models (GAMM) from the mgcv package in R for all sensitivity analyses. To

175 fit the model assumptions, we logit-transformed  $\bar{\alpha}$ -diversity, and log-transformed  $\beta$ - and  $\gamma$ -diversity. The emigration  
176 parameters were separately used as fixed effects and the ID of the food web (1 - 30) as random factor (with normal  
177 distribution for  $\bar{\alpha}$ - and  $\beta$ -diversity, and binomial distribution for  $\gamma$ -diversity). Both parameters show no strong effect in  
178 all tested cases (figure S5 - S7). Only the maximum emigration rate  $a$  of consumers shows a small negative effect on  
179  $\bar{\alpha}$ -diversity (figure S5). As a higher maximum emigration rate results in an overall larger loss term due to dispersal,  
180 which fits to our general findings.

181 Additional sensitivity analysis for interference competition, allometric exponent for attack rates of consumer species,  
182 exponents for handling time, hill coefficient and nutrient turnover rate were omitted as they were tested thoroughly in  
183 [1]. There, the dynamics of the food web model were shown to be robust to changes in model parameters. For each  
184 of the 2073 simulation runs the parameters of the trophic interactions were independently sampled from appropriate  
185 probability distributions within ecologically reasonable limits (see table 1). To account for the stochastic nature of the  
186 algorithm provided by Schneider *et al.* [1] by which food web topologies are created, we generated an ensemble of 30  
187 food webs by randomly sampling 30 sets of species body masses.

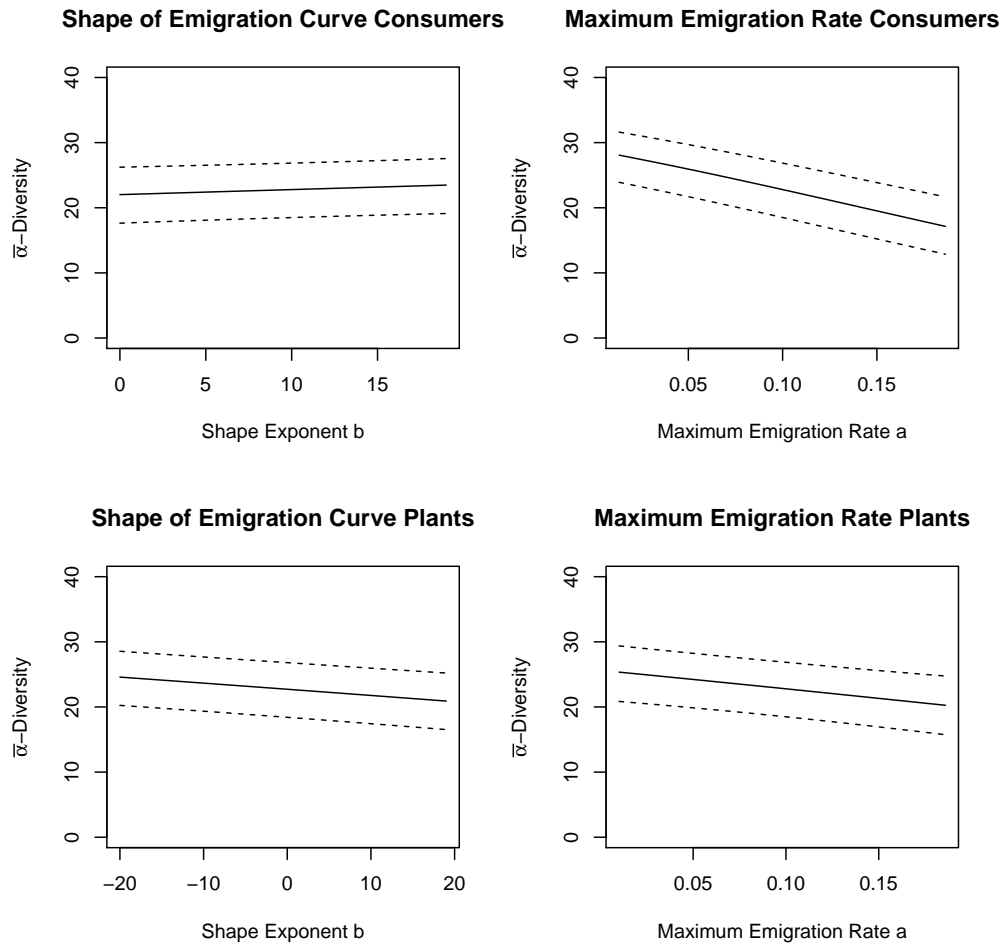

Figure S5:  $\bar{\alpha}$ -diversity (y-axes) of consumers and plants in dependence of the maximum emigration rate,  $a$ , and the shape of the emigration function,  $b$  respectively (x-axes).

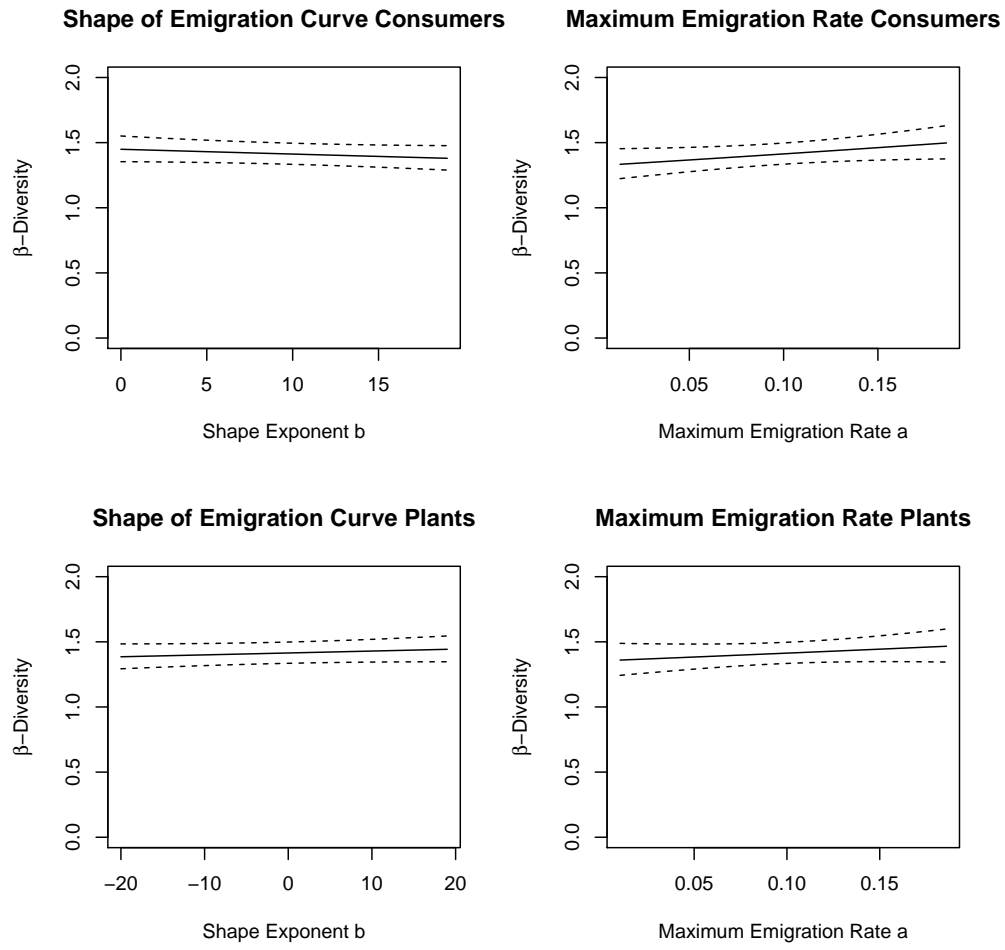

Figure S6:  $\beta$ -diversity (y-axes) of consumers and plants in dependence of the maximum emigration rate,  $a$ , and the shape of the emigration function,  $b$  respectively (x-axes).

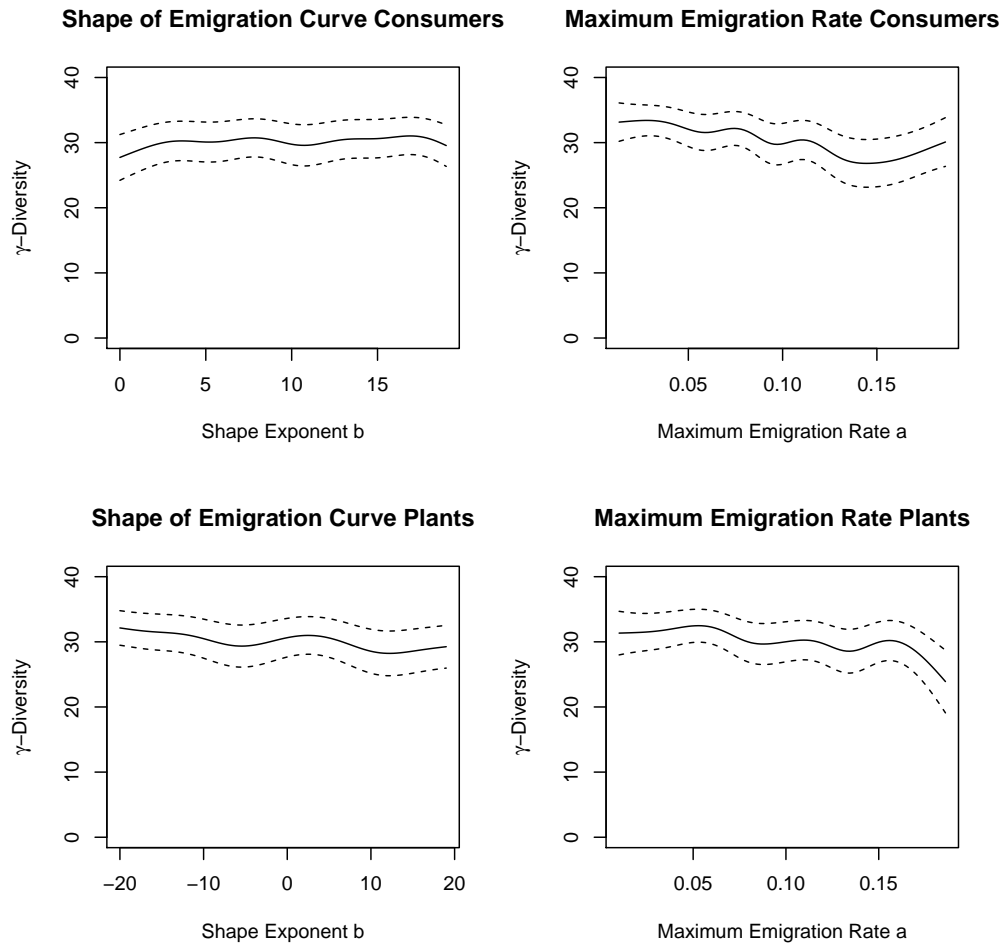

Figure S7:  $\gamma$ -diversity (y-axes) of consumers and plants in dependence of the maximum emigration rate,  $a$ , and the shape of the emigration function,  $b$  respectively (x-axes).

188 **S9 Initial and post-simulation  $\beta$ -diversity**

189 To see how the initialised  $\beta$ -diversity (see section S4) influenced the post-simulation  $\beta$ -diversity we performed a  
 190 generalised additive mixed model (GAMM) from the mgcv package in R with the initial  $\beta$ -diversity as fixed effect and  
 191 the post-simulation  $\beta$ -diversity as the response variable. Both were log-transformed to fit model assumptions. The  
 192 post-simulation  $\beta$ -diversity and initial  $\beta$ -diversity were not correlated. This suggests that the initial  $\beta$ -diversity which is  
 193 due to initialising the patches in the landscape with only a subset of species from the regional species pool does not

194 influence the post-simulation  $\beta$ -diversity delectably (approximate p-value: 0.518) (figure S8).

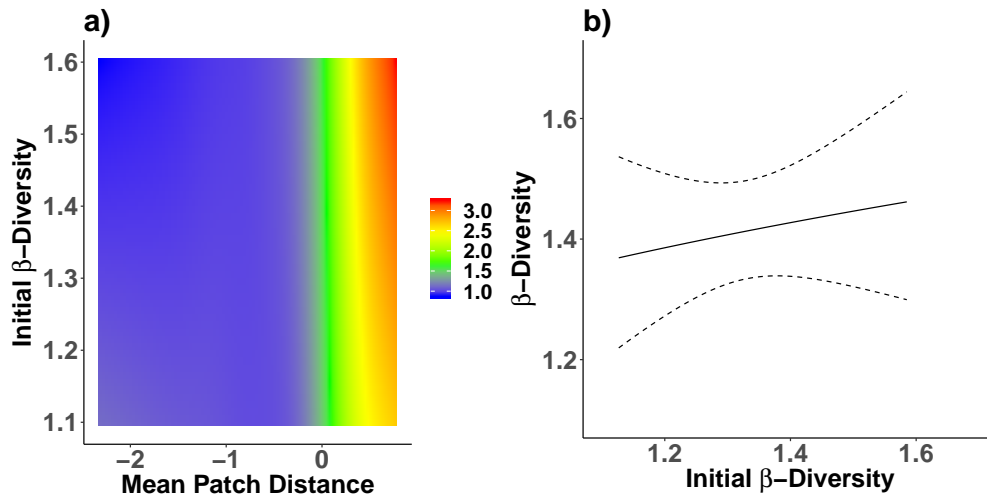

Figure S8: (a) The post-simulation  $\beta$ -diversity (y-axis) and the initial  $\beta$ -diversity (x-axis) were not correlated. (b) Heatmap visualising  $\beta$ -diversity (colour-coded; z-axis) in response to habitat isolation, i.e. the mean patch distance ( $\bar{\tau}$ ,  $\log_{10}$ -transformed; x-axis) and the initial  $\beta$ -diversity (y-axis). The heatmap was generated based on the statistical model predictions (see the methods section in the manuscript). In strongly isolated landscapes  $\beta$ -diversity increases slightly with higher initial  $\beta$ -diversity. However, post-simulation  $\beta$ -diversity is higher than the initial  $\beta$ -diversity.

**S10 Standard errors in biomass densities**

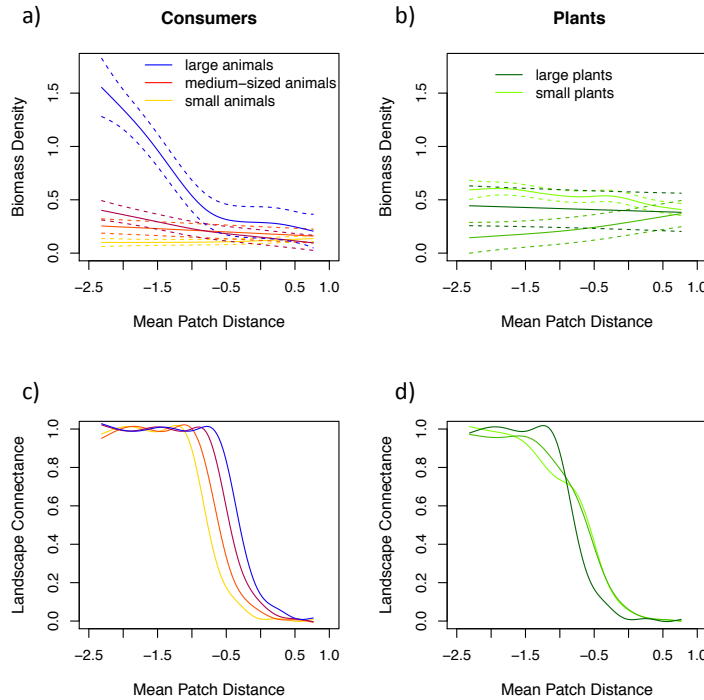

Figure S9: Top row: Mean biomass densities [ $\log_{10}(\text{biomass density} - 1)$ ] with standard errors [ $\pm 2 \cdot \text{SE}$ ] for four exemplary animal consumer species (a) and three exemplary basal plant species (b) over all food webs ( $B_i$ ,  $\log_{10}$ -transformed; y-axis) in response to habitat isolation, i.e. the mean patch distance ( $\bar{\tau}$ ,  $\log_{10}$ -transformed; x-axis). Each colour depicts the biomass density of species  $i$  averaged over all food webs: (a) colour gradient where orange represents the smallest, red the intermediate and blue the largest consumer species; (b) colour gradient where light green represents the smallest and dark green the largest plant species. Bottom row: Mean species-specific landscape connectance ( $\rho_i$ ; y-axis) for consumer (c) and plant species (d) over all food webs as a function of the mean patch distance ( $\bar{\tau}$ ,  $\log_{10}$ -transformed; x-axis).

## References

- 196
- 197 [1] Schneider FD, Brose U, Rall BC, Guill C, 2016 Animal diversity and ecosystem functioning in dynamic food  
198 webs. *Nature Communications* **7**, 1–8. doi:10.1038/ncomms12718
- 199 [2] Kalinkat G, Schneider FD, Digel C, Guill C, Rall BC, Brose U, 2013 Body masses, functional responses and  
200 predator–prey stability. *Ecology Letters* **16**, 1126–1134. doi:10.1111/ele.12147
- 201 [3] Brose U, 2008 Complex food webs prevent competitive exclusion among producer species. *Proceedings of the*  
202 *Royal Society of London B: Biological Sciences* **275**
- 203 [4] Williams RJ, Martinez ND, 2000 Simple rules yield complex food webs. *Nature* **404**, 180–183. doi:  
204 10.1038/35004572
- 205 [5] Riede JO, Binzer A, Brose U, de Castro F, Curtsdotter A, Rall BC, Eklöf A, 2011 Size-based food web  
206 characteristics govern the response to species extinctions. *Basic and Applied Ecology* **12**, 581–589. doi:  
207 10.1016/J.BAAE.2011.09.006
- 208 [6] Brose U, *et al.*, 2019 Predator traits determine food-web architecture across ecosystems. *Nat. Ecol. Evol.*  
209 doi:10.1038/s41559-019-0899-x
- 210 [7] Lang B, Ehnes RB, Brose U, Rall BC, 2017 Temperature and consumer type dependencies of energy flows in  
211 natural communities. *Oikos* **126**, 1717–1725. doi:10.1111/oik.04419
- 212 [8] Ehnes RB, Rall BC, Brose U, 2011 Phylogenetic grouping, curvature and metabolic scaling in terrestrial  
213 invertebrates. *Ecology Letters* **14**, 993–1000. doi:10.1111/j.1461-0248.2011.01660.x
- 214 [9] Yodzis P, Innes S, 1992 Body size and consumer-resource dynamics. *The American Naturalist* **139**, 1151–1175.  
215 doi:10.1086/285380
- 216 [10] Hirt MR, Jetz W, Rall rC, Brose U, 2017 A general scaling law reveals why the largest animals are not the fastest.  
217 *Nature Ecology & Evolution* **1**, 1116–1122. doi:10.1038/s41559-017-0241-4
- 218 [11] Rall BC, Brose U, Hartvig M, Kalinkat G, Schwarzmüller F, Vucic-Pestic O, Petchey OL, 2012 Universal temperature  
219 and body-mass scaling of feeding rates. *Phil. Trans. R. Soc. B* **367**, 2923–2934. doi:10.1098/rstb.2012.0242
- 220 [12] Penrose M, 2003 *Random geometric graphs*. Oxford University Press
- 221 [13] Amarasekare P, 2008 Spatial dynamics of foodwebs. *Annual Review of Ecology, Evolution, and Systematics* **39**,  
222 479–500. doi:10.1146/annurev.ecolsys.39.110707.173434
- 223 [14] Fronhofer EA, *et al.*, 2017 Bottom-up and top-down control of dispersal across major organismal groups: a  
224 coordinated distributed experiment. *bioRxiv* doi:10.1101/213256
- 225 [15] Abrams PA, Ruokolainen L, 2011 How does adaptive consumer movement affect population dynamics in  
226 consumer–resource metacommunities with homogeneous patches? *Journal of Theoretical Biology* **277**, 99–110.  
227 doi:10.1016/j.jtbi.2011.02.019
- 228 [16] Ims RA, Andreassen HP, 2005 Density-dependent dispersal and spatial population dynamics. *Proceedings.*  
229 *Biological sciences* **272**, 913–8. doi:10.1098/rspb.2004.3025
- 230 [17] Bowler DE, Benton TG, 2005 Causes and consequences of animal dispersal strategies: relating individual  
231 behaviour to spatial dynamics. *Biological Reviews* **80**, 205–225. doi:10.1017/S1464793104006645



- 232 [18] Miyazaki Y, Osawa T, Waguchi Y, 2009 Resource level as a proximate factor influencing fluctuations in male  
233 flower production in *Cryptomeria japonica* D. Don. *Journal of Forest Research* **14**, 358–364. doi:10.1007/s10310-  
234 009-0148-2
- 235 [19] Furtado Macedo A, 2012 Abiotic Stress Responses in Plants: Metabolism to Productivity. In P Ahmad, M Prasad,  
236 eds., *Abiotic Stress Response in Plants*, 41–61. Springer, New York, NY. doi:10.1007/978-1-4614-0634-1
- 237 [20] Jenkins DG, *et al.*, 2007 Does size matter for dispersal distance? *Global Ecology and Biogeography* **16**, 415–425.  
238 doi:10.1111/j.1466-8238.2007.00312.x
- 239 [21] Holt RD, 2002 Food webs in space: On the interplay of dynamic instability and spatial processes. *Ecological*  
240 *Research* **17**, 261–273. doi:10.1046/j.1440-1703.2002.00485.x
- 241 [22] Jetz W, Carbone C, Fulford J, Brown JH, 2004 The scaling of animal space use. *Science (New York, N.Y.)* **306**,  
242 266–8. doi:10.1126/science.1102138
- 243 [23] Holt R, Hoopes M, 2005 *Food Web Dynamics in a Metacommunity Context: Modules and Beyond*. October 2016.  
244 The University of Chicago Press
- 245 [24] Schnicke T, Langenberg B, Krause C. Eve - high-performance computing cluster
- 246 [25] Hindmarsh AC, Brown PN, Grant KE, Lee SL, Serban R, Shumaker DE, Woodward CS, 2005 Sundials. *ACM*  
247 *Transactions on Mathematical Software* **31**, 363–396. doi:10.1145/1089014.1089020
- 248 [26] Wood SN, 2017 *Generalized Additive Models: An Introduction with R (wnd edition)*. Chapman and Hall/CRC.,  
249 wnd editio edn.
- 250 [27] R Core Team, 2016. R: A Language and Environment for Statistical Computing
- 251 [28] Whittaker RH, 1972 Evolution and Measurement of Species Diversity. *Taxon* **21**, 213. doi:10.2307/1218190
